# Supplementary material
Source: PubMed Central journal article supplement (PMC9064943)
Supplement: NIHMS1788744-supplement-supinfo.pdf [file NIHMS1788744-supplement-supinfo.pdf]

## SUPPLEMENTAL MATERIAL

|                                                                                                                                                            |          |
|------------------------------------------------------------------------------------------------------------------------------------------------------------|----------|
| <b>SUPPLEMENTAL FIGURES</b> .....                                                                                                                          | <b>2</b> |
| Figure S1. Propensity score distributions.....                                                                                                             | 2        |
| <b>SUPPLEMENTAL TABLES</b> .....                                                                                                                           | <b>3</b> |
| Table S1. Outcome definitions .....                                                                                                                        | 3        |
| Table S2. Diagnosis and procedure codes used to identify covariates.....                                                                                   | 4        |
| Table S3. Lists of relevant medications .....                                                                                                              | 8        |
| Table S4. Baseline characteristics of the SSRI-PPI exposure groups <i>before</i> inverse probability of treatment weighting .....                          | 10       |
| Table S5. Baseline characteristics of the SSRI-PPI exposure groups <i>after</i> inverse probability of treatment weighting .....                           | 14       |
| Table S6. Association between SSRI-PPI exposure group and the 1-year risk of sudden cardiac death .....                                                    | 18       |
| Table S7. Association between SSRI-PPI exposure group and the 1-year risk of sudden cardiac death considering citalopram and escitalopram separately ..... | 19       |
| Table S8. Results from sensitivity analyses .....                                                                                                          | 20       |
| Table S9. Association between SSRI-PPI exposure group and the 1-year risk of the negative control outcome .....                                            | 21       |

## SUPPLEMENTAL FIGURES

### Figure S1. Propensity score distributions

Panel A. Citalopram/escitalopram + PPI propensity score distribution

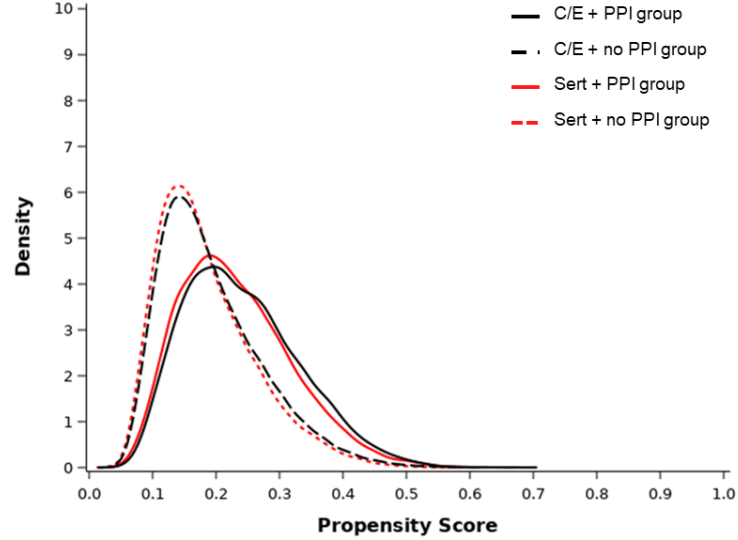

Panel B. Citalopram/escitalopram + no PPI propensity score distribution

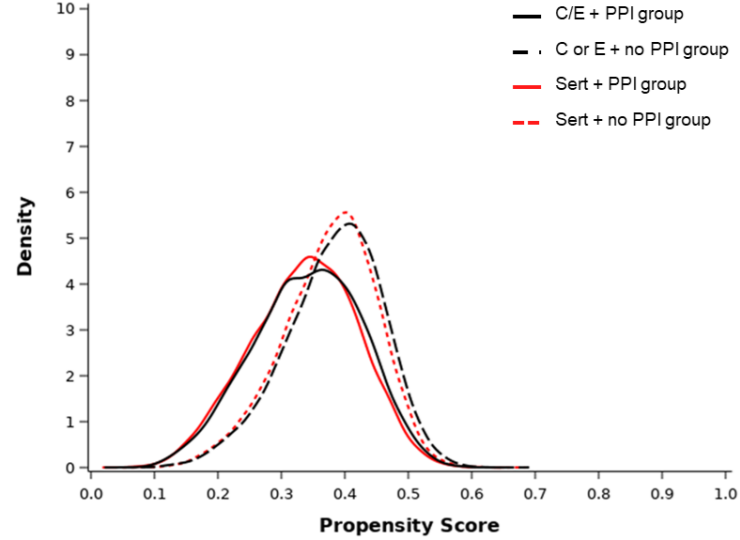

Panel C. Sertraline + PPI propensity score distribution

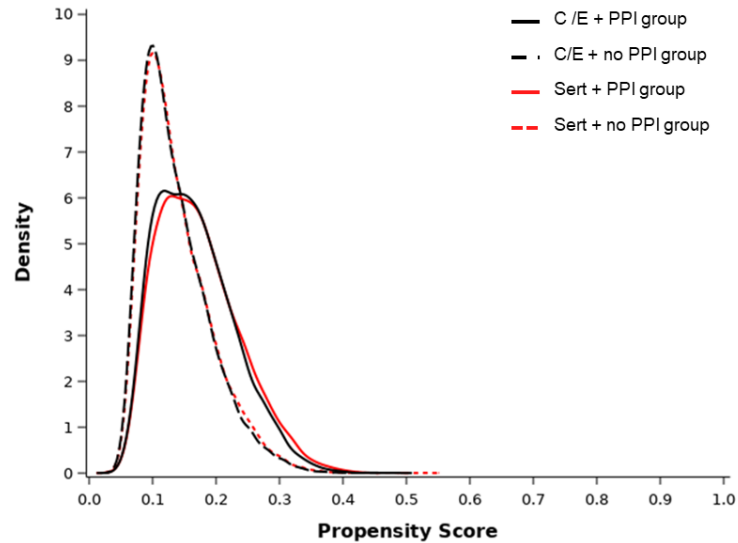

Panel D. Sertraline + no PPI propensity score distribution

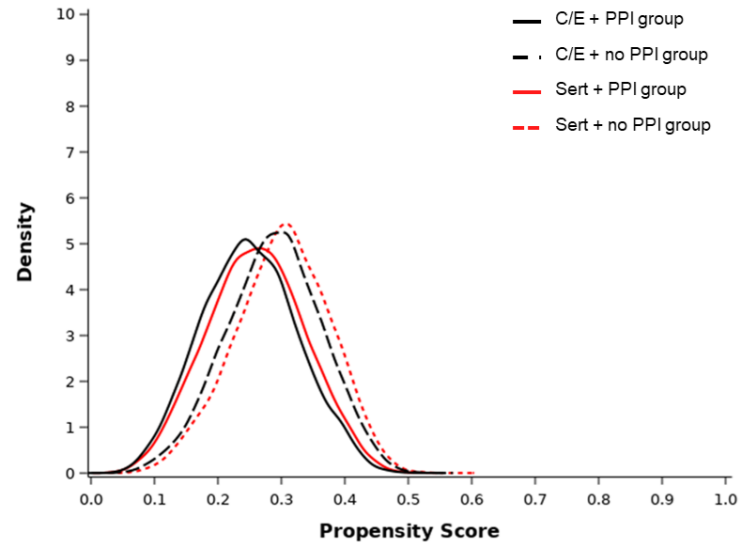

Each panel shows the distribution for one of the four estimated propensity scores across each of the exposure groups.

Abbreviations: C/E, citalopram or escitalopram; PPI, proton pump inhibitor; Sert, sertraline.

## SUPPLEMENTAL TABLES

Table S1. Outcome definitions

| Primary outcome                                                                               |                                                                                                                                                                                                                                                                                                                                                                                                                                                                                                               |
|-----------------------------------------------------------------------------------------------|---------------------------------------------------------------------------------------------------------------------------------------------------------------------------------------------------------------------------------------------------------------------------------------------------------------------------------------------------------------------------------------------------------------------------------------------------------------------------------------------------------------|
| Outcome                                                                                       | Specification                                                                                                                                                                                                                                                                                                                                                                                                                                                                                                 |
| Sudden cardiac death                                                                          | Death with a cardiac arrhythmia or cardiac arrest death code (28, 29) listed as the <i>primary</i> cause of death on the End Stage Renal Disease Death Notification Form.                                                                                                                                                                                                                                                                                                                                     |
| Secondary outcomes                                                                            |                                                                                                                                                                                                                                                                                                                                                                                                                                                                                                               |
| Outcome                                                                                       | Specification                                                                                                                                                                                                                                                                                                                                                                                                                                                                                                 |
| Composite outcome of sudden cardiac death <i>or</i> hospitalized ventricular arrhythmia       | <p>Death with a cardiac arrhythmia or cardiac arrest death code (28, 29) listed as the <i>primary</i> cause of death on the End Stage Renal Disease Death Notification Form.</p> <p style="text-align: center;"><i>OR</i></p> <p>An inpatient hospitalization for a ventricular arrhythmia based on the <i>primary</i> ICD-9/ICD-10 discharge diagnosis code.</p> <ul style="list-style-type: none"> <li>○ ICD-9 codes<sup>a</sup>: 427.1, 427.4</li> <li>○ ICD-10 codes<sup>b</sup>: I47.2, I49.0</li> </ul> |
| Cardiovascular mortality                                                                      | Death with a cardiovascular cause of death code (23, 25, 26, 27, 28, 29, 30, 31, 32, 35, 36) listed as the <i>primary</i> cause of death on the End Stage Renal Disease Death Notification Form.                                                                                                                                                                                                                                                                                                              |
| Negative control outcome                                                                      |                                                                                                                                                                                                                                                                                                                                                                                                                                                                                                               |
| Outcome                                                                                       | Specification                                                                                                                                                                                                                                                                                                                                                                                                                                                                                                 |
| Death due to a cause other than sudden cardiac death (i.e., <i>non-sudden cardiac death</i> ) | Death with a non-sudden cardiac death code (all codes except 28 and 29) the <i>primary</i> cause of death on the End Stage Renal Disease Death Notification Form.                                                                                                                                                                                                                                                                                                                                             |

<sup>a</sup> Specified four-digit ICD-9 diagnosis codes listed included all existing includes all existing 5th digit codes.

<sup>b</sup> Specified four-digit ICD-10 diagnosis codes listed include all existing 5th, 6th, and 7th digit codes.

Abbreviations: ICD-9, International Classification of Diseases, 9th Revision; ICD-10, International Classification of Diseases, 10th Revision.

**Table S2. Diagnosis and procedure codes used to identify covariates**

| Comorbid conditions             |                                                                                                                                                                                                                                                                                                                                                                                                                                                                                                                                                       |
|---------------------------------|-------------------------------------------------------------------------------------------------------------------------------------------------------------------------------------------------------------------------------------------------------------------------------------------------------------------------------------------------------------------------------------------------------------------------------------------------------------------------------------------------------------------------------------------------------|
| Comorbidity                     | Diagnosis <sup>a</sup> or procedure codes <sup>b</sup>                                                                                                                                                                                                                                                                                                                                                                                                                                                                                                |
| Anxiety                         | <ul style="list-style-type: none"> <li>○ ICD-9 codes: 300.0, 309.21, 309.24, 309.28</li> <li>○ ICD-10 codes: F41, F43.22, F43.23, F93.0</li> </ul>                                                                                                                                                                                                                                                                                                                                                                                                    |
| Depression                      | <ul style="list-style-type: none"> <li>○ ICD-9 codes: 296.2, 296.3, 296.5, 296.6, 296.82, 300.4, 309.0, 309.1, 309.28, 311</li> <li>○ ICD-10 codes: F31.30–F31.32, F31.4–F31.6, F31.75–F31.78, F32.0–F32.5, F32.89, F32.9, F33.0–F33.9, F34.1, F43.21, F43.23</li> </ul>                                                                                                                                                                                                                                                                              |
| Other psychiatric conditions    | <ul style="list-style-type: none"> <li>○ ICD-9 codes: 296.0, 296.4–296.8, 297, 301, 295</li> <li>○ ICD-10 codes: F22, F23, F24, F21, F30, F31, F32.89, F34.0, F34.1, F60, F68.10, F68.12, F68.13, F69, F20, F25</li> </ul>                                                                                                                                                                                                                                                                                                                            |
| Dementia                        | <ul style="list-style-type: none"> <li>○ ICD-9 diagnosis codes: 331.0–331.2, 331.7, 331.82, 290.0–290.4, 294.0–294.2, 797</li> <li>○ ICD-10 diagnosis codes: F01.5, F02.8, F03.9, F04, F05, G13.2, G13.8, G30, G31.0–G31.2, G31.83, G91.4, G94, R41.81, R54</li> </ul>                                                                                                                                                                                                                                                                                |
| Insomnia                        | <ul style="list-style-type: none"> <li>○ ICD-9 codes: 307.41, 307.42, 327.0, 780.51, 780.52</li> <li>○ ICD-10 codes: F51.0, G47.00, G47.0</li> </ul>                                                                                                                                                                                                                                                                                                                                                                                                  |
| Gastroesophageal reflux disease | <ul style="list-style-type: none"> <li>○ ICD-9 code: 530.81</li> <li>○ ICD-10 code: K21</li> </ul>                                                                                                                                                                                                                                                                                                                                                                                                                                                    |
| Peptic ulcer                    | <ul style="list-style-type: none"> <li>○ ICD-9 code: 533</li> <li>○ ICD-10 code: K27</li> </ul>                                                                                                                                                                                                                                                                                                                                                                                                                                                       |
| Other type of ulcer             | <ul style="list-style-type: none"> <li>○ ICD-9 codes: 530.2, 531, 532, 534</li> <li>○ ICD-10 codes: K22.1, K25, K26, K28</li> </ul>                                                                                                                                                                                                                                                                                                                                                                                                                   |
| Gastrointestinal bleed          | <ul style="list-style-type: none"> <li>○ ICD-9 diagnosis codes: 531.0, 531.2, 531.4, 531.6, 532.0, 532.2, 532.4, 532.6, 533.0, 533.2, 533.4, 533.6, 534.0, 534.2, 534.4, 534.6, 562.02, 562.03, 562.12, 562.13, 569.3, 569.85, 578.0, 578.1, 578.9</li> <li>○ ICD-10 diagnosis codes: : K25.0, K25.2, K25.4, K25.6, K26.0, K26.2, K26.4, K26.6, K27.0, K27.2, K27.4, K27.6, K28.0, K28.2, K28.4, K28.6, K55.21, K57.01, K57.11, K57.13, K57.21, K57.31, K57.33, K57.41, K57.51, K57.53, K57.81, K57.91, K57.93, K62.5, K92.0, K92.1, K92.2</li> </ul> |
| Arrhythmia                      | <ul style="list-style-type: none"> <li>○ ICD-9 diagnosis codes: 427</li> <li>○ ICD-10 diagnosis codes: I46–I49</li> </ul>                                                                                                                                                                                                                                                                                                                                                                                                                             |
| Conduction disorder             | <ul style="list-style-type: none"> <li>○ ICD-9 diagnosis codes: 426</li> <li>○ ICD-10 diagnosis codes: I44–I45</li> </ul>                                                                                                                                                                                                                                                                                                                                                                                                                             |
| Dyslipidemia                    | <ul style="list-style-type: none"> <li>○ ICD-9 diagnosis codes: 272.0–272.2, 272.4</li> <li>○ ICD-10 diagnosis codes: E78.0, E78.1, E78.2, E78.4, E78.5</li> </ul>                                                                                                                                                                                                                                                                                                                                                                                    |
| Heart failure                   | <ul style="list-style-type: none"> <li>○ ICD-9 diagnosis codes: 398.91, 402.x1, 404.x1, 404.x3, 428</li> <li>○ ICD-10 diagnosis codes: I09.81, I11.0, I13.0, I50</li> </ul>                                                                                                                                                                                                                                                                                                                                                                           |

|                                                 |                                                                                                                                                                                                                                                                                                  |
|-------------------------------------------------|--------------------------------------------------------------------------------------------------------------------------------------------------------------------------------------------------------------------------------------------------------------------------------------------------|
| Hypertension                                    | <ul style="list-style-type: none"> <li>○ ICD-9 diagnosis codes: 401–405</li> <li>○ ICD-10 diagnosis codes: I10–I16</li> </ul>                                                                                                                                                                    |
| Ischemic heart disease                          | <ul style="list-style-type: none"> <li>○ ICD-9 diagnosis codes: 410–414</li> <li>○ ICD-10 diagnosis codes: I20–I25</li> </ul>                                                                                                                                                                    |
| Peripheral arterial disease                     | <ul style="list-style-type: none"> <li>○ ICD-9 diagnosis codes: 250.7, 440.2–440.9, 443.1, 443.22, 443.81, 443.89, 443.9, 444.22, 444.81, 445.02</li> <li>○ ICD-10 diagnosis codes: E10.5, E11.5, E13.5, I70.2–I70.9, I73.1, I73.89, I73.9, I74.3–I74.5, I75.02, I77.72, I79.1, I79.8</li> </ul> |
| Stroke                                          | <ul style="list-style-type: none"> <li>○ ICD-9 diagnosis codes: 430–438</li> <li>○ ICD-10 diagnosis codes: G45–G46, I60–I69</li> </ul>                                                                                                                                                           |
| Valvular disease                                | <ul style="list-style-type: none"> <li>○ ICD-9 diagnosis codes: 394–397, 424.0–424.3</li> <li>○ ICD-10 diagnosis codes: I05–I08, I09.1, I34–I37</li> </ul>                                                                                                                                       |
| Cardiac pacemaker                               | <ul style="list-style-type: none"> <li>○ ICD-9 diagnosis codes: V45.01</li> <li>○ ICD-10 diagnosis codes: Z95.0</li> </ul>                                                                                                                                                                       |
| Electrocardiogram                               | <ul style="list-style-type: none"> <li>○ CPT procedure codes: 93000, 93005, 93010, 93040, 93041, 93042</li> </ul>                                                                                                                                                                                |
| Cardiac surgery or procedure                    | <ul style="list-style-type: none"> <li>○ ICD-9 procedure codes: 35, 36, 37</li> <li>○ ICD-10 procedure code: 02</li> </ul>                                                                                                                                                                       |
| Asthma or chronic obstructive pulmonary disease | <ul style="list-style-type: none"> <li>○ ICD-9 diagnosis codes: 491–494, 496</li> <li>○ ICD-10 diagnosis codes: J41–J45, J47</li> </ul>                                                                                                                                                          |
| Cancer                                          | <ul style="list-style-type: none"> <li>○ ICD-9 diagnosis codes: 140–209</li> <li>○ ICD-10 diagnosis codes: C00–C96, C7A</li> </ul>                                                                                                                                                               |
| Diabetes                                        | <ul style="list-style-type: none"> <li>○ ICD-9 diagnosis codes: 250</li> <li>○ ICD-10 diagnosis codes: E10, E11, E13</li> </ul>                                                                                                                                                                  |
| Hypothyroidism                                  | <ul style="list-style-type: none"> <li>○ ICD-9 diagnosis codes: 243, 244</li> <li>○ ICD-10 diagnosis codes: E00, E01.8, E02, E03.0–E03.3, E03.8, E03.9, E89.0</li> </ul>                                                                                                                         |
| Liver disease                                   | <ul style="list-style-type: none"> <li>○ ICD-9 code: 571</li> <li>○ ICD-10 codes: K70–K76</li> </ul>                                                                                                                                                                                             |
| Sleep apnea                                     | <ul style="list-style-type: none"> <li>○ ICD-9 codes: 327.2, 780.51, 780.53, 780.57</li> <li>○ ICD-10 code: G47.3</li> </ul>                                                                                                                                                                     |
| Alcohol use or dependence                       | <ul style="list-style-type: none"> <li>○ ICD-9 codes: 303, 305.0</li> <li>○ ICD-10 codes: F10.10, F10.11, F10.120, F10.129, F10.20, F10.21, F10.220, F10.229</li> </ul>                                                                                                                          |
| Drug use or dependence                          | <ul style="list-style-type: none"> <li>○ ICD-9 codes: 304, 305.2–305.9</li> <li>○ ICD-10 codes: F11.10, F11.11, F11.120, F11.129, F11.20–F11.25, F11.28, F11.29, F11.90, F12.10, F12.11, F12.20–F12.25, F12.28, F12.29, F13.10, F13.11, F13.120, F13.20–</li> </ul>                              |

F13.29, F13.90, F14.10, F14.11, F14.120, F14.20–F14.25, F14.28, F14.29, F14.90, F15.10, F15.11, F15.120, F15.20–F15.25, F15.28, F15.29, F15.90, F16.10, F16.11, F16.120, F16.20–F16.25, F16.28, F16.29, F16.90, F18.10, F18.11, F18.120, F18.20–F18.25, F18.27, F18.28, F18.29, F18.90, F19.10, F19.11, F19.120, F19.20–F19.29, F19.90, F55

Tobacco use

- ICD-9 code: 305.1
- ICD-10 codes: F17.200, F17.201, F17.210, F17.211, F17.220, F17.221, F17.290, F17.291

History of non-compliance

- ICD-9 codes: V15.81, V45.12
- ICD-10 codes: Z91.1

### Frailty indicators<sup>c</sup>

#### Frailty indicator

#### Diagnosis<sup>a</sup> or procedure codes<sup>b</sup>

Abnormal gait

- ICD-9 code: 781.2
- ICD-10 codes: R26.0, R26.1, R26.81, R26.89, R26.9

Abnormal loss of weight or underweight

- ICD-9 codes: 783.21, 783.22
- ICD-10 codes: R63.4, R63.6

Cachexia

- ICD-9 code: 799.4
- ICD-10 code: R64

Debility

- ICD-9 code: 799.3
- ICD-10 code: R53.81

Difficulty walking

- ICD-9 code: 719.7
- ICD-10 code: R26.2

Failure to thrive

- ICD-9 code: 783.7
- ICD-10 code: R62.7

Fall history

- ICD-9 code: V15.88
- ICD-10 code: Z91.81

Malaise or fatigue

- ICD-9 code: 780.7
- ICD-10 codes: G93.3, R53

Muscular wasting or disease atrophy

- ICD-9 code: 728.2
- ICD-10 codes: M62.50–M62.59

Muscle weakness

- ICD-9 code: 728.87
- ICD-10 codes: M62.81

Pressure ulcer

- ICD-9 codes: 707.0, 707.2
- ICD-10 codes: L89.000–L89.004, L89.009, L89.010–L89.014, L89.019, L89.020–L89.024, L89.029, L89.100–L89.104, L89.109, L89.110–L89.114, L89.119, L89.120–L89.124, L89.129, L89.130–L89.134, L89.139, L89.140–L89.144, L89.149, L89.150–L89.154, L89.159, L89.200–L89.204, L89.209, L89.210–L89.214, L89.219, L89.220–L89.224, L89.229, L89.300–L89.304, L89.309, L89.310–L89.314, L89.319, L89.320–L89.324, L89.329, L89.40–L89.45, L89.500–L89.504, L89.509, L89.510–L89.514, L89.519, L89.520–

L89.520, L89.529, L89.600–L89.604, L89.609, L89.610–L89.614, L89.619, L89.620–L89.624, L89.629, L89.810–L89.814, L89.819, L89.890–L89.894, L89.899, L89.90–L89.95

Senility

- ICD-9 code: 797
- ICD-10 codes: R41.81, R54

Using durable medical equipment (cane, walker, bath equipment, or commode)

- HCPCS codes: E0100, E0105, E0130, E0135, E0140, E0141, E0143, E0144, E0147–E0149, E0160–E0171

Using nursing or personal healthcare services

- HCPCS codes: T1000–T1005, T1019–T1022, T1030, T1031

### Healthcare encounters for mental health services

#### Encounter

#### Diagnosis<sup>a</sup> or procedure codes<sup>b</sup>

Psychotherapy

- CPT codes: 90785, 90804–90819, 90821–90824, 90826–90829, 90832–90834, 90836–90844, 90846–90847, 90849, 90853, 90855, 90857, 90863

Mental health hospitalization

- ICD-9 codes: 290–316
- ICD-10 codes: F01–F69, F80–99

<sup>a</sup> Specified three-digit ICD-9 diagnosis codes included all existing 4th and 5th digit diagnosis codes, and specified four-digit ICD-9 diagnosis codes included all existing 5th digit diagnosis codes. Specified three-digit ICD-10 diagnosis codes included all existing 4th, 5th, 6th, and 7th digit diagnosis codes; specified four-digit ICD-10 diagnosis codes included all existing 5th, 6th, and 7th digit diagnosis codes; specified five-digit ICD-10 diagnosis codes included all existing 6th and 7th digit diagnosis codes; and specified six-digit ICD-10 diagnosis codes include all existing 7th digit codes.

<sup>b</sup> Specified two-digit ICD-9 procedure codes include all existing 3rd and 4th digit procedure codes. Specified two-digit ICD-10 procedure codes include all specified 3<sup>rd</sup>, 4<sup>th</sup>, 5<sup>th</sup>, 6<sup>th</sup>, and 7<sup>th</sup> digit procedure codes.

<sup>c</sup> A total of 14 validated frailty indicators associated with mortality were considered. Frailty indicators included: abnormal gait, abnormal loss of weight or underweight, cachexia, debility, difficulty walking, failure to thrive, fall history, malaise or fatigue, muscular wasting or disease atrophy, muscle weakness, pressure ulcers, senility, using durable medical equipment (cane, walker, bath equipment, or commode), and using nursing or healthcare services.

**Abbreviations:** CPT, Current Procedural Terminology; HCPCS, Healthcare Common Procedure Coding System, ICD-9, International Classification of Diseases, 9th Revision; ICD-10, International Classification of Diseases, 10th Revision.

**Table S3. Lists of relevant medications**

|                                                                                                                                                                                                                                                                                                                                                                                                                                                                                                                                                                                                                                                                                                                                                                                                                                                                                                                                                                                                                                                                                                                                                                                                                                                                                                                                                                                                                                                                                                                                                                                                                                                                                                                                                                                         |
|-----------------------------------------------------------------------------------------------------------------------------------------------------------------------------------------------------------------------------------------------------------------------------------------------------------------------------------------------------------------------------------------------------------------------------------------------------------------------------------------------------------------------------------------------------------------------------------------------------------------------------------------------------------------------------------------------------------------------------------------------------------------------------------------------------------------------------------------------------------------------------------------------------------------------------------------------------------------------------------------------------------------------------------------------------------------------------------------------------------------------------------------------------------------------------------------------------------------------------------------------------------------------------------------------------------------------------------------------------------------------------------------------------------------------------------------------------------------------------------------------------------------------------------------------------------------------------------------------------------------------------------------------------------------------------------------------------------------------------------------------------------------------------------------|
| <b>QT-prolonging medications with known torsade de pointes risk<sup>a,b</sup></b>                                                                                                                                                                                                                                                                                                                                                                                                                                                                                                                                                                                                                                                                                                                                                                                                                                                                                                                                                                                                                                                                                                                                                                                                                                                                                                                                                                                                                                                                                                                                                                                                                                                                                                       |
| Aclarubicin, amiodarone, anagrelide, arsenic trioxide, astemizole, azithromycin, bepridil, cesium chloride, chloroquine, chlorpromazine, chlorprothixene, cilostazol, ciprofloxacin, cisapride, clarithromycin, cocaine, disopyramide, dofetilide, domperidone, donepezil, dronedarone, droperidol, erythromycin, flecainide, fluconazole, gatifloxacin, grepafloxacin, halofantrine, haloperidol, hydroquinidine, hydroxychloroquine, ibogaine, ibutilide, levomepromazine, levomethadyl, levosulpiride, mesoridazine, methadone, , nifekalant, ondansetron, oxaliplatin, papaverine, pentamidine, pimozide, probucol, procainamide, propofol, quinidine, roxithromycin, sevoflurane, sotalol, sparfloxacin, sulpiride, sultopride, terfenadine, terlipressin, terodiline, thioridazine, vandetanib                                                                                                                                                                                                                                                                                                                                                                                                                                                                                                                                                                                                                                                                                                                                                                                                                                                                                                                                                                                    |
| <b>QT-prolonging medications with possible torsade de pointes risk<sup>a,c</sup></b>                                                                                                                                                                                                                                                                                                                                                                                                                                                                                                                                                                                                                                                                                                                                                                                                                                                                                                                                                                                                                                                                                                                                                                                                                                                                                                                                                                                                                                                                                                                                                                                                                                                                                                    |
| Abarelix, alfuzosin, alimemazine, apalutamide, apomorphine, aripiprazole, artemether/lumefantrine, artenimol/piperaquine, asenapine, atomoxetine, bedaquiline, bendamustine, benperidol, betrixaban, bortezomib, bosutinib, buprenorphine, cabozantinib, capecitabine, carbetocin, ceritinib, clofazimine, clotiapine, clozapine, cobimetinib, crizotinib, cyamemazine, dabrafenib, dasatinib, degarelix, delamanid, desipramine, deutetrabenazine, dexmedetomidine, dextromethorphan/quinidine, dolasetron, efavirenz, eliglustat, encorafenib, epirubicin, eribulin, ezogabine, felbamate, fingolimod, fluorouracil, flupentixol, gemifloxacin, gilteritinib, glasdegib, granisetron, hydrocodone ER, iloperidone, imipramine, inotuzumab, isradipine, ivosidenib, ketanserin, lacidipine, lapatinib, lenvatinib leuprolide, lithium, lofexidine, lopinavir/ritonavir, lumateperone, <b>lurasidone</b> , maprotiline, melperone, memantine, mianserin, midostaurin, mifepristone, mirabegron, mirtazapine, moexipril/hydrochlorothiazide, necitumumab, nifedipine, nilotinib, norfloxacin, nortriptyline, nusinersen, ofloxacin, osilodrostat, osimertinib, oxytocin, paliperidone, palonosetron, panobinostat, pasireotide, pazopanib, perflutren, perphenazine, pilsicainide, pimavanserin, pipamperone, pitolisant, pretomanid, primaquine, promethazine, prothipendyl, ribociclib, rilpivirine, romidepsin, rucaparib, saquinavir, selpercatinib, sertindole, siponimod, sorafenib, sunitinib, tacrolimus, tamoxifen, tazemetostat, telavancin, telithromycin, tetrabenazine, tiapride, tipiracil/trifluridine, tizanidine, tolterodine, toremifene, tramadol, trimipramine, tropisetron, valbenazine, vardenafil, vemurafenib, venlafaxine, vorinostat, zotepine, zuclopenthixol |
| <b>QT-prolonging medications with conditional torsade de pointes risk<sup>a,d</sup></b>                                                                                                                                                                                                                                                                                                                                                                                                                                                                                                                                                                                                                                                                                                                                                                                                                                                                                                                                                                                                                                                                                                                                                                                                                                                                                                                                                                                                                                                                                                                                                                                                                                                                                                 |
| Abiraterone, amantadine, amisulpride, amitriptyline, amphotericin B, amsacrine, atazanavir, bendroflumethiazide, bendrofluazide, chloral hydrate, cimetidine, clomipramine, diphenhydramine, doxepin, eperisone, famotidine, furosemide, galantamine, garenoxacin, hydrochlorothiazide, hydroxyzine, indapamide, itraconazole, ivabradine, ketoconazole, loperamide, metoclopramide, metolazone, metronidazole, nelfinavir, olanzapine, paroxetine, piperacillin/tazobactam, posaconazole, propafenone, quetiapine, quinine, ranolazine, risperidone, solifenacin, telaprevir, toremifene, trazodone, voriconazole, ziprasidone                                                                                                                                                                                                                                                                                                                                                                                                                                                                                                                                                                                                                                                                                                                                                                                                                                                                                                                                                                                                                                                                                                                                                         |
| <b>Alpha blockers</b>                                                                                                                                                                                                                                                                                                                                                                                                                                                                                                                                                                                                                                                                                                                                                                                                                                                                                                                                                                                                                                                                                                                                                                                                                                                                                                                                                                                                                                                                                                                                                                                                                                                                                                                                                                   |
| Alfuzosin, doxazosin, prazosin, silodosin, terazosin                                                                                                                                                                                                                                                                                                                                                                                                                                                                                                                                                                                                                                                                                                                                                                                                                                                                                                                                                                                                                                                                                                                                                                                                                                                                                                                                                                                                                                                                                                                                                                                                                                                                                                                                    |
| <b>Angiotensin-converting enzyme inhibitors</b>                                                                                                                                                                                                                                                                                                                                                                                                                                                                                                                                                                                                                                                                                                                                                                                                                                                                                                                                                                                                                                                                                                                                                                                                                                                                                                                                                                                                                                                                                                                                                                                                                                                                                                                                         |
| Benazepril, captopril, enalapril, fosinopril, lisinopril, moexipril, perindopril, quinapril, ramipril, trandolapril                                                                                                                                                                                                                                                                                                                                                                                                                                                                                                                                                                                                                                                                                                                                                                                                                                                                                                                                                                                                                                                                                                                                                                                                                                                                                                                                                                                                                                                                                                                                                                                                                                                                     |
| <b>Angiotensin receptor blocker</b>                                                                                                                                                                                                                                                                                                                                                                                                                                                                                                                                                                                                                                                                                                                                                                                                                                                                                                                                                                                                                                                                                                                                                                                                                                                                                                                                                                                                                                                                                                                                                                                                                                                                                                                                                     |
| Azilsartan, candesartan, eprosartan, irbesartan, losartan, olmesartan, telmisartan, valsartan                                                                                                                                                                                                                                                                                                                                                                                                                                                                                                                                                                                                                                                                                                                                                                                                                                                                                                                                                                                                                                                                                                                                                                                                                                                                                                                                                                                                                                                                                                                                                                                                                                                                                           |
| <b>Beta blockers</b>                                                                                                                                                                                                                                                                                                                                                                                                                                                                                                                                                                                                                                                                                                                                                                                                                                                                                                                                                                                                                                                                                                                                                                                                                                                                                                                                                                                                                                                                                                                                                                                                                                                                                                                                                                    |
| Acebutolol, atenolol, betaxolol, bisoprolol, carteolol, carvedilol, esmolol, labetalol, metoprolol, nadolol, nebivolol, oxprenolol, penbutolol, pindolol, propranolol, sotalol, timolol                                                                                                                                                                                                                                                                                                                                                                                                                                                                                                                                                                                                                                                                                                                                                                                                                                                                                                                                                                                                                                                                                                                                                                                                                                                                                                                                                                                                                                                                                                                                                                                                 |
| <b>Calcium channel blockers</b>                                                                                                                                                                                                                                                                                                                                                                                                                                                                                                                                                                                                                                                                                                                                                                                                                                                                                                                                                                                                                                                                                                                                                                                                                                                                                                                                                                                                                                                                                                                                                                                                                                                                                                                                                         |
| Amlodipine, clevidipine, diltiazem, felodipine, isradipine, levamlodipine, nifedipine, nimodipine, nisoldipine, verapamil                                                                                                                                                                                                                                                                                                                                                                                                                                                                                                                                                                                                                                                                                                                                                                                                                                                                                                                                                                                                                                                                                                                                                                                                                                                                                                                                                                                                                                                                                                                                                                                                                                                               |
| <b>Central alpha agonists</b>                                                                                                                                                                                                                                                                                                                                                                                                                                                                                                                                                                                                                                                                                                                                                                                                                                                                                                                                                                                                                                                                                                                                                                                                                                                                                                                                                                                                                                                                                                                                                                                                                                                                                                                                                           |
| Clonidine, methyl dopa, guanabenz, guanfacine                                                                                                                                                                                                                                                                                                                                                                                                                                                                                                                                                                                                                                                                                                                                                                                                                                                                                                                                                                                                                                                                                                                                                                                                                                                                                                                                                                                                                                                                                                                                                                                                                                                                                                                                           |
| <b>Diuretics</b>                                                                                                                                                                                                                                                                                                                                                                                                                                                                                                                                                                                                                                                                                                                                                                                                                                                                                                                                                                                                                                                                                                                                                                                                                                                                                                                                                                                                                                                                                                                                                                                                                                                                                                                                                                        |



|                                                                                                                                                                                                                                                                                                                                                                                                                                    |
|------------------------------------------------------------------------------------------------------------------------------------------------------------------------------------------------------------------------------------------------------------------------------------------------------------------------------------------------------------------------------------------------------------------------------------|
| Bumetanide, ethacrynic acid, furosemide, torsemide, bendroflumethiazide, chlorothiazide, hydrochlorothiazide, methyclothiazide, polythiazide, chlorthalidone, indapamide, metolazone, amiloride, triamterene, spironolactone, eplerenone, acetazolamide                                                                                                                                                                            |
| <b>Vasodilators</b>                                                                                                                                                                                                                                                                                                                                                                                                                |
| Hydralazine, minoxidil                                                                                                                                                                                                                                                                                                                                                                                                             |
| <b>Anticoagulants</b>                                                                                                                                                                                                                                                                                                                                                                                                              |
| Warfarin, apixaban, betrixaban, dabigatran, edoxaban, rivaroxaban                                                                                                                                                                                                                                                                                                                                                                  |
| <b>Antiplatelet agents</b>                                                                                                                                                                                                                                                                                                                                                                                                         |
| Cliostazol, clopidogrel, dipyridamole, prasugrel, ticagrelor, ticlopidine, trifusal, vorapaxar                                                                                                                                                                                                                                                                                                                                     |
| <b>Statin</b>                                                                                                                                                                                                                                                                                                                                                                                                                      |
| Atorvastatin, fluvastatin, lovastatin, mevastatin, pitavastatin, pravastatin, rosuvastatin, simvastatin                                                                                                                                                                                                                                                                                                                            |
| <b>Non-statin cholesterol medication</b>                                                                                                                                                                                                                                                                                                                                                                                           |
| Niacin, cholestyramine, colestipol, colesevelam, bezafibrate, ciprofibrate, clofibrate, gemfibrozil, fenofibrate, clinofibrate, ezetimibe                                                                                                                                                                                                                                                                                          |
| <b>Antiarrhythmics (class I and III)</b>                                                                                                                                                                                                                                                                                                                                                                                           |
| Quinidine, disopyramide, procainamide, lidocaine, mexiletine, propafenone, flecainide, ranolazine, amiodarone, dronedarone, dofetilide, ibutilide, sotalol, pinacidil                                                                                                                                                                                                                                                              |
| <b>Digoxin</b>                                                                                                                                                                                                                                                                                                                                                                                                                     |
| Digoxin                                                                                                                                                                                                                                                                                                                                                                                                                            |
| <b>Long-acting nitrate</b>                                                                                                                                                                                                                                                                                                                                                                                                         |
| Nitroglycerin, isosorbide dinitrate, isosorbide mononitrate                                                                                                                                                                                                                                                                                                                                                                        |
| <b>Midodrine</b>                                                                                                                                                                                                                                                                                                                                                                                                                   |
| Midodrine                                                                                                                                                                                                                                                                                                                                                                                                                          |
| <b>Cytochrome P450 inhibitors (<i>other than PPIs</i>)<sup>e</sup></b>                                                                                                                                                                                                                                                                                                                                                             |
| Amiodarone, amprenavir, aprepitant, atazanavir, chloramphenicol, clarithromycin, conivaptan, cyclosporine, darunavir, dasatinib, delavirdine, diltiazem, erythromycin, fluconazole, fosamprenavir, imatinib, indinavir, isoniazid, itraconazole, ketoconazole, lapatinib, miconazole, nefazodone, nelfinavir, posaconazole, ritonavir, quinupristin, saquinavir, tamoxifen, telithromycin, troleandomycin, verapamil, voriconazole |
| <b>Cytochrome P450 3A4 inhibitors<sup>e</sup></b>                                                                                                                                                                                                                                                                                                                                                                                  |
| Chloramphenicol, cimetidine, clopidogrel, delavirdine, efavirenz, felbamate, fluconazole, indomethacin, isoniazid, ketoconazole, luliconazole, moclobemide, modafinil, oritavancin, oxcarbazepine, probenecid, rucaparib, ticlopidine, topiramate, voriconazole                                                                                                                                                                    |

<sup>a</sup> The CredibleMeds website (<https://crediblemeds.org>) is a reliable online clinical resource with up-to-date information about medications that can cause QT-prolongation and/or torsade de pointes. CredibleMeds classifies QT-prolonging medications as having a known, possible, or conditional TdP risk. Lists of QT-prolonging medications were obtained website on March 1, 2021.

<sup>b</sup> CredibleMeds defines medications with known torsade de pointes risk as drugs that prolong the QT-interval *and* are clearly associated with a known risk of torsade de pointes, even when taken as recommended.

<sup>c</sup> CredibleMeds defines medications with possible torsade de pointes risk as drugs that can cause QT-prolongation *but* currently lack evidence for a risk of torsade de pointes when taken as recommended.

<sup>d</sup> CredibleMeds defines medications with conditional torsade de pointes risk as drugs that are associated with torsade de pointes only under certain conditions (e.g., excessive dose, when taken with interacting drugs) *or* drugs that create conditions that facilitate or induce torsade de pointes (e.g., cause an electrolyte disturbance that induces torsade de pointes).

<sup>e</sup> Lists of cytochrome P450 inhibitors were obtained from the Pharmacy Times website (<https://www.pharmacytimes.com>) and Flockhart Table website (<https://drug-interactions.medicine.iu.edu/MainTable.aspx>) on March 1, 2021.

**Table S4. Baseline characteristics of the SSRI-PPI exposure groups *before* inverse probability of treatment weighting**

| Characteristic                                              | Citalopram/escitalopram |                      | Sertraline        |                      | Max std diff <sup>a</sup> |
|-------------------------------------------------------------|-------------------------|----------------------|-------------------|----------------------|---------------------------|
|                                                             | PPI<br>n = 14,983       | No PPI<br>n = 26,503 | PPI<br>n = 10,779 | No PPI<br>n = 20,294 |                           |
| <b>Year of SSRI new-use</b>                                 |                         |                      |                   |                      |                           |
| 2007                                                        | 1,543 (10%)             | 2,539 (10%)          | 975 (9%)          | 1,819 (9%)           | 0.05                      |
| 2008                                                        | 1,613 (11%)             | 2,627 (10%)          | 919 (9%)          | 1,689 (8%)           | 0.08                      |
| 2009                                                        | 1,602 (11%)             | 2,566 (10%)          | 1,015 (9%)        | 1,684 (8%)           | 0.08                      |
| 2010                                                        | 1,525 (10%)             | 2,697 (10%)          | 889 (8%)          | 1,699 (8%)           | 0.07                      |
| 2011                                                        | 1,381 (9%)              | 2,721 (10%)          | 929 (9%)          | 1,631 (8%)           | 0.08                      |
| 2012                                                        | 1,319 (9%)              | 2,350 (9%)           | 927 (9%)          | 1,741 (9%)           | 0.01                      |
| 2013                                                        | 1,336 (9%)              | 2,227 (8%)           | 965 (9%)          | 1,872 (9%)           | 0.03                      |
| 2014                                                        | 1,300 (9%)              | 2,275 (9%)           | 1,018 (9%)        | 1,909 (9%)           | 0.03                      |
| 2015                                                        | 1,185 (8%)              | 2,201 (8%)           | 1,031 (10%)       | 1,991 (10%)          | 0.07                      |
| 2016                                                        | 1,147 (8%)              | 2,171 (8%)           | 1,049 (10%)       | 2,116 (10%)          | 0.10                      |
| 2017                                                        | 1,032 (7%)              | 2,129 (8%)           | 1,062 (10%)       | 2,143 (11%)          | 0.13                      |
| <b>SSRI new-use before the 2011 FDA warning<sup>b</sup></b> | 7,209 (48%)             | 12,227 (46%)         | 4,398 (41%)       | 7,956 (39%)          | 0.18                      |
| <b>Age (years)</b>                                          | 61 ± 15                 | 60 ± 16              | 61.5(14.58)       | 59.9(15.55)          | 0.11                      |
| <b>Female</b>                                               | 8,361 (56%)             | 13,683 (52%)         | 5,892 (55%)       | 10,222 (50%)         | 0.11                      |
| <b>Race</b>                                                 |                         |                      |                   |                      |                           |
| Black                                                       | 5,320 (36%)             | 9,814 (37%)          | 3,633 (34%)       | 7,280 (36%)          | 0.07                      |
| White                                                       | 9,068 (61%)             | 15,615 (59%)         | 6,602 (61%)       | 11,984 (59%)         | 0.05                      |
| Other                                                       | 595 (4%)                | 1,074 (4%)           | 544 (5%)          | 1,030 (5%)           | 0.05                      |
| <b>Hispanic</b>                                             | 2,528 (17%)             | 4,247 (16%)          | 2,029 (19%)       | 3,812 (19%)          | 0.07                      |
| <b>Medicare Part D low income subsidy</b>                   | 11,559 (77%)            | 18,607 (70%)         | 7,946 (74%)       | 13,782 (68%)         | 0.21                      |
| <b>Cause of dialysis-dependent kidney failure</b>           |                         |                      |                   |                      |                           |
| Diabetes                                                    | 7,811 (52%)             | 13,097 (49%)         | 5,682 (53%)       | 10,057 (50%)         | 0.07                      |
| Glomerular disease                                          | 1,518 (10%)             | 2,755 (10%)          | 1,058 (10%)       | 2,147 (11%)          | 0.03                      |
| Hypertension                                                | 3,709 (25%)             | 6,933 (26%)          | 2,641 (25%)       | 5,291 (26%)          | 0.04                      |
| Other                                                       | 1,945 (13%)             | 3,718 (14%)          | 1,398 (13%)       | 2,799 (14%)          | 0.03                      |
| <b>History of a prior kidney transplant</b>                 | 963 (6%)                | 1,675 (6%)           | 678 (6%)          | 1,343 (7%)           | 0.01                      |
| <b>Dialysis vintage</b>                                     |                         |                      |                   |                      |                           |
| < 1.0 year                                                  | 2,443 (16%)             | 4,591 (17%)          | 1,648 (15%)       | 3,397 (17%)          | 0.06                      |
| 1.0 – 1.9 years                                             | 2,697 (18%)             | 5,129 (19%)          | 1,903 (18%)       | 3,861 (19%)          | 0.04                      |
| 2.0 – 2.9 years                                             | 2,265 (15%)             | 3,915 (15%)          | 1,644 (15%)       | 2,982 (15%)          | 0.02                      |

|                                                            |              |              |              |              |      |
|------------------------------------------------------------|--------------|--------------|--------------|--------------|------|
| ≥ 3.0 years                                                | 7,578 (51%)  | 12,868 (49%) | 5,584 (52%)  | 10,054 (50%) | 0.07 |
| <b>Anxiety</b>                                             | 3,635 (24%)  | 5,717 (22%)  | 2,644 (25%)  | 4,299 (21%)  | 0.08 |
| <b>Depression</b>                                          | 5,657 (38%)  | 9,557 (36%)  | 3,831 (36%)  | 6,775 (33%)  | 0.09 |
| <b>Other psychiatric conditions</b>                        | 853 (6%)     | 1,385 (5%)   | 530 (5%)     | 964 (5%)     | 0.04 |
| <b>Dementia</b>                                            | 1,730 (12%)  | 2,976 (11%)  | 1,128 (10%)  | 1,992 (10%)  | 0.06 |
| <b>Insomnia</b>                                            | 1,298 (9%)   | 2,091 (8%)   | 1,007 (9%)   | 1,666 (8%)   | 0.05 |
| <b>GERD</b>                                                | 6,432 (43%)  | 6,711 (25%)  | 4,719 (44%)  | 4,964 (24%)  | 0.42 |
| <b>Peptic ulcer</b>                                        | 396 (3%)     | 379 (1%)     | 274 (3%)     | 267 (1%)     | 0.10 |
| <b>Other type of ulcer</b>                                 | 802 (5%)     | 639 (2%)     | 525 (5%)     | 399 (2%)     | 0.18 |
| <b>GI bleed</b>                                            | 2,383 (16%)  | 2,510 (9%)   | 1,663 (15%)  | 1,734 (9%)   | 0.23 |
| <b>Arrhythmia</b>                                          | 5,288 (35%)  | 7,918 (30%)  | 3,809 (35%)  | 6,070 (30%)  | 0.12 |
| <b>Conduction disorder</b>                                 | 1,497 (10%)  | 2,339 (9%)   | 1,178 (11%)  | 1,997 (10%)  | 0.07 |
| <b>Dyslipidemia</b>                                        | 8,565 (57%)  | 14,161 (53%) | 6,484 (60%)  | 11,069 (55%) | 0.14 |
| <b>Heart failure</b>                                       | 7,884 (53%)  | 12,335 (47%) | 5,663 (53%)  | 9,327 (46%)  | 0.13 |
| <b>Hypertension</b>                                        | 14,068 (94%) | 24,068 (91%) | 10,074 (93%) | 18,337 (90%) | 0.13 |
| <b>Ischemic heart disease</b>                              | 8,110 (54%)  | 12,531 (47%) | 5,811 (54%)  | 9,498 (47%)  | 0.15 |
| <b>Peripheral artery disease</b>                           | 6,026 (40%)  | 9,562 (36%)  | 4,302 (40%)  | 7,014 (35%)  | 0.12 |
| <b>Stroke</b>                                              | 4,395 (29%)  | 6,898 (26%)  | 3,005 (28%)  | 4,956 (24%)  | 0.11 |
| <b>Valvular disease</b>                                    | 3,501 (23%)  | 5,540 (21%)  | 2,666 (25%)  | 4,223 (21%)  | 0.09 |
| <b>Cardiac pacemaker</b>                                   | 807 (5%)     | 1,222 (5%)   | 588 (5%)     | 912 (4%)     | 0.04 |
| <b>ECG during the last 30 days of baseline</b>             | 4,859 (32%)  | 7,633 (29%)  | 3,531 (33%)  | 5,695 (28%)  | 0.10 |
| <b>Cardiac surgery during the last 30 days of baseline</b> | 158 (1%)     | 269 (1%)     | 114 (1%)     | 193 (1%)     | 0.01 |
| <b>Asthma or COPD</b>                                      | 5,352 (36%)  | 7,660 (29%)  | 3,826 (35%)  | 5,726 (28%)  | 0.16 |
| <b>Cancer</b>                                              | 1,475 (10%)  | 2,384 (9%)   | 1,020 (9%)   | 1,793 (9%)   | 0.04 |
| <b>Diabetes</b>                                            | 11,007 (73%) | 18,270 (69%) | 7,919 (73%)  | 14,003 (69%) | 0.10 |
| <b>Hypothyroidism</b>                                      | 3,241 (22%)  | 4,826 (18%)  | 2,343 (22%)  | 3,670 (18%)  | 0.09 |
| <b>Liver disease</b>                                       | 1,049 (7%)   | 1,558 (6%)   | 834 (8%)     | 1,306 (6%)   | 0.07 |
| <b>Sleep apnea</b>                                         | 1,993 (13%)  | 2,991 (11%)  | 1,568 (15%)  | 2,395 (12%)  | 0.10 |
| <b>Alcohol use or dependence</b>                           | 404 (3%)     | 635 (2%)     | 273 (3%)     | 427 (2%)     | 0.04 |
| <b>Drug Abuse or dependence</b>                            | 787 (5%)     | 1,567 (6%)   | 577 (5%)     | 1,090 (5%)   | 0.03 |
| <b>Tobacco use</b>                                         | 2,246 (15%)  | 3,886 (15%)  | 1,606 (15%)  | 2,947 (15%)  | 0.01 |
| <b>History of non-compliance</b>                           | 1,809 (12%)  | 3,492 (13%)  | 1,407 (13%)  | 2,814 (14%)  | 0.05 |
| <b># of frailty indicators</b>                             |              |              |              |              |      |
| 0                                                          | 5,544 (37%)  | 11,724 (44%) | 4,245 (39%)  | 9,535 (47%)  | 0.20 |
| 1                                                          | 3,416 (23%)  | 5,537 (21%)  | 2,404 (22%)  | 4,254 (21%)  | 0.05 |
| 2                                                          | 2,159 (14%)  | 3,438 (13%)  | 1,545 (14%)  | 2,479 (12%)  | 0.07 |

|                                                             |             |             |             |             |        |
|-------------------------------------------------------------|-------------|-------------|-------------|-------------|--------|
| 3                                                           | 1,628 (11%) | 2,410 (9%)  | 1,054 (10%) | 1,675 (8%)  | 0.09   |
| 4                                                           | 1,074 (7%)  | 1,663 (6%)  | 713 (7%)    | 1,114 (5%)  | 0.07   |
| 5                                                           | 669 (4%)    | 971 (4%)    | 476 (4%)    | 673 (3%)    | 0.06   |
| 6                                                           | 285 (2%)    | 474 (2%)    | 218 (2%)    | 336 (2%)    | 0.03   |
| ≥ 7                                                         | 208 (1%)    | 286 (1%)    | 124 (1%)    | 228 (1%)    | 0.03   |
| <b>Abnormal gait</b>                                        | 2,751 (18%) | 4,396 (17%) | 1,911 (18%) | 3,169 (16%) | 0.07   |
| <b>Abnormal loss of weight or underweight</b>               | 586 (4%)    | 840 (3%)    | 437 (4%)    | 649 (3%)    | 0.05   |
| <b>Cachexia</b>                                             | 234 (2%)    | 329 (1%)    | 157 (1%)    | 242 (1%)    | 0.03   |
| <b>Debility</b>                                             | 1,949 (13%) | 2,975 (11%) | 1,320 (12%) | 2,118 (10%) | 0.08   |
| <b>Difficulty walking</b>                                   | 2,390 (16%) | 3,685 (14%) | 1,656 (15%) | 2,525 (12%) | 0.10   |
| <b>Failure to thrive</b>                                    | 500 (3%)    | 668 (3%)    | 290 (3%)    | 433 (2%)    | 0.07   |
| <b>Fall history</b>                                         | 1,035 (7%)  | 1,694 (6%)  | 758 (7%)    | 1,283 (6%)  | 0.03   |
| <b>Malaise and fatigue</b>                                  | 5,622 (38%) | 8,817 (33%) | 3,952 (37%) | 6,514 (32%) | 0.11   |
| <b>Muscular wasting and disease atrophy</b>                 | 782 (5%)    | 1,245 (5%)  | 494 (5%)    | 792 (4%)    | 0.06   |
| <b>Muscle weakness</b>                                      | 3,948 (26%) | 6,053 (23%) | 2,721 (25%) | 4,205 (21%) | 0.13   |
| <b>Pressure ulcer</b>                                       | 2,303 (15%) | 3,239 (12%) | 1,446 (13%) | 2,272 (11%) | 0.12   |
| <b>Senility</b>                                             | 112 (1%)    | 177 (1%)    | 79 (1%)     | 164 (1%)    | 0.02   |
| <b>Using durable medical equipment (e.g., cane, walker)</b> | 1,290 (9%)  | 1,985 (7%)  | 888 (8%)    | 1,407 (7%)  | 0.06   |
| <b>Using nursing or healthcare services</b>                 | < 11 (0%)   | < 11 (0%)   | < 11 (0%)   | < 11 (0%)   | < 0.00 |
| <b>Alpha blocker</b>                                        | 442 (3%)    | 649 (2%)    | 329 (3%)    | 576 (3%)    | 0.04   |
| <b>ACE inhibitor</b>                                        | 2,852 (19%) | 4,305 (16%) | 2,008 (19%) | 3,278 (16%) | 0.08   |
| <b>ARB</b>                                                  | 1,734 (12%) | 2,372 (9%)  | 1,249 (12%) | 1,890 (9%)  | 0.09   |
| <b>Beta blocker</b>                                         | 6,469 (43%) | 9,269 (35%) | 4,689 (44%) | 7,329 (36%) | 0.18   |
| <b>Calcium channel blocker</b>                              | 4,658 (31%) | 7,327 (28%) | 3,475 (32%) | 5,741 (28%) | 0.10   |
| <b>Central alpha agonist</b>                                | 1,966 (13%) | 3,080 (12%) | 1,384 (13%) | 2,324 (11%) | 0.05   |
| <b>Diuretic</b>                                             | 1,651 (11%) | 2,354 (9%)  | 1,235 (11%) | 1,945 (10%) | 0.09   |
| <b>Vasodilator</b>                                          | 1,824 (12%) | 2,801 (11%) | 1,415 (13%) | 2,217 (11%) | 0.08   |
| <b>Anticoagulant</b>                                        | 1,276 (9%)  | 1,836 (7%)  | 967 (9%)    | 1,421 (7%)  | 0.08   |
| <b>Antiplatelet</b>                                         | 2,054 (14%) | 2,782 (10%) | 1,470 (14%) | 2,171 (11%) | 0.10   |
| <b>Statin</b>                                               | 4,665 (31%) | 5,994 (23%) | 3,625 (34%) | 4,903 (24%) | 0.25   |
| <b>Non-statin cholesterol med</b>                           | 747 (5%)    | 805 (3%)    | 466 (4%)    | 596 (3%)    | 0.11   |
| <b>Antiarrhythmic</b>                                       | 584 (4%)    | 756 (3%)    | 496 (5%)    | 599 (3%)    | 0.09   |
| <b>Digoxin</b>                                              | 258 (2%)    | 370 (1%)    | 179 (2%)    | 252 (1%)    | 0.04   |
| <b>Long-acting nitrate</b>                                  | 1,240 (8%)  | 1,468 (6%)  | 927 (9%)    | 1,188 (6%)  | 0.12   |
| <b>Midodrine</b>                                            | 559 (4%)    | 602 (2%)    | 445 (4%)    | 597 (3%)    | 0.11   |

|                                                             |             |              |             |             |      |
|-------------------------------------------------------------|-------------|--------------|-------------|-------------|------|
| <b>≥ 1 CYP 3A4 inhibitor</b>                                | 1,278 (9%)  | 1,728 (7%)   | 919 (9%)    | 1,311 (6%)  | 0.08 |
| <b>≥ 1 other CYP 2C19 inhibitor</b>                         | 2,174 (15%) | 2,913 (11%)  | 1,537 (14%) | 2,266 (11%) | 0.11 |
| <b>≥ 1 med with any TdP risk<sup>c</sup></b>                | 6,314 (42%) | 8,726 (33%)  | 4,489 (42%) | 6,613 (33%) | 0.20 |
| <b>≥ 1 med with known TdP risk<sup>c</sup></b>              | 1,770 (12%) | 2,381 (9%)   | 1,317 (12%) | 1,804 (9%)  | 0.11 |
| <b>≥ 1 med with possible TdP risk<sup>c</sup></b>           | 1,893 (13%) | 2,388 (9%)   | 1,267 (12%) | 1,665 (8%)  | 0.15 |
| <b>≥ 1 med with conditional TdP risk<sup>c</sup></b>        | 4,272 (29%) | 5,855 (22%)  | 2,994 (28%) | 4,447 (22%) | 0.15 |
| <b>Number of baseline hospital admissions</b>               |             |              |             |             |      |
| 0 admissions                                                | 4,859 (32%) | 10,237 (39%) | 3,721 (35%) | 8,522 (42%) | 0.20 |
| 1 – 2 admissions                                            | 5,794 (39%) | 10,096 (38%) | 4,199 (39%) | 7,582 (37%) | 0.03 |
| 3 – 4 admissions                                            | 2,794 (19%) | 4,075 (15%)  | 1,863 (17%) | 2,826 (14%) | 0.13 |
| ≥ 5 admissions                                              | 1,536 (10%) | 2,095 (8%)   | 996 (9%)    | 1,364 (7%)  | 0.13 |
| <b>Hospitalized in the last 30 days of baseline</b>         | 5,198 (35%) | 7,781 (29%)  | 3,477 (32%) | 5,479 (27%) | 0.17 |
| <b>Number of baseline ED visits</b>                         |             |              |             |             |      |
| 0 ED visits                                                 | 3,227 (22%) | 7,090 (27%)  | 2,476 (23%) | 5,814 (29%) | 0.17 |
| 1 – 2 ED visits                                             | 5,406 (36%) | 9,624 (36%)  | 3,856 (36%) | 7,417 (37%) | 0.02 |
| 3 – 4 ED visits                                             | 3,111 (21%) | 5,021 (19%)  | 2,211 (21%) | 3,645 (18%) | 0.07 |
| ≥ 5 ED visits                                               | 3,239 (22%) | 4,768 (18%)  | 2,236 (21%) | 3,418 (17%) | 0.12 |
| <b>ED visit in the last 30 days of baseline</b>             | 5,616 (37%) | 8,829 (33%)  | 3,957 (37%) | 6,567 (32%) | 0.11 |
| <b>SNF admission during baseline</b>                        | 4,061 (27%) | 6,351 (24%)  | 2,500 (23%) | 3,899 (19%) | 0.19 |
| <b>Mental health hospitalization during baseline</b>        | 72 (0%)     | 160 (1%)     | 66 (1%)     | 129 (1%)    | 0.02 |
| <b>Outpatient visit with a psychiatrist during baseline</b> | 466 (3%)    | 793 (3%)     | 235 (2%)    | 446 (2%)    | 0.06 |
| <b>Psychotherapy during baseline</b>                        | 1,651 (11%) | 2,666 (10%)  | 995 (9%)    | 1,617 (8%)  | 0.10 |

Values are given as number (%) for categorical variables and as mean ± standard deviation for continuous variables. All covariates were measured during the 180-day baseline period. The weighted cohort is the pseudo-population generated by inverse probability of treatment weighting.

<sup>a</sup> The standardized differences displayed in the table are the maximum absolute standardized differences observed across all exposure group pairs. A standardized difference > 0.10 represents meaningful imbalance between groups.

<sup>b</sup> The FDA issued a Drug Safety Communication on August 28, 2011, warning that abnormal heart rhythms have been associated with high doses of citalopram.

<sup>c</sup> The CredibleMeds website (<https://crediblemeds.org>) is a reliable online clinical resource with up-to-date information about medications that can cause QT-prolongation and/or torsades de pointes. CredibleMeds classifies QT-prolonging medications as having a known, possible, or conditional TdP risk. Lists of medications falling into each category are provided in Table S3. Medications classified as having any level of TdP risk are those falling into any of the three CredibleMeds categories.

**Abbreviations:** ACE, angiotensin converting enzyme; ARB, angiotensin receptor blocker; COPD, chronic obstructive pulmonary disease; CYP, cytochrome P450; ECG, electrocardiogram; ED, emergency department; FDA, Food and Drug Administration; GERD, gastroesophageal reflux disease; GI, gastrointestinal; med, medication; PPI, proton pump inhibitor; SNF, skilled nursing facility; SSRI, selective serotonin reuptake inhibitor; TdP, Torsades de Pointes

**Table S5. Baseline characteristics of the SSRI-PPI exposure groups after inverse probability of treatment weighting**

| Characteristic                                              | Citalopram/escitalopram |                      | Sertraline        |                      | Max std diff <sup>a</sup> |
|-------------------------------------------------------------|-------------------------|----------------------|-------------------|----------------------|---------------------------|
|                                                             | PPI<br>n = 14,860       | No PPI<br>n = 26,581 | PPI<br>n = 10,726 | No PPI<br>n = 20,341 |                           |
| <b>Year of SSRI new-use</b>                                 |                         |                      |                   |                      |                           |
| 2007                                                        | 1,406 (9%)              | 2,524 (9%)           | 1,029 (10%)       | 1,909 (9%)           | 0.01                      |
| 2008                                                        | 1,387 (9%)              | 2,488 (9%)           | 1,017 (9%)        | 1,916 (9%)           | 0.01                      |
| 2009                                                        | 1,414 (10%)             | 2,528 (10%)          | 1,038 (10%)       | 1,925 (9%)           | 0.01                      |
| 2010                                                        | 1,401 (9%)              | 2,500 (9%)           | 1,022 (10%)       | 1,886 (9%)           | 0.01                      |
| 2011                                                        | 1,378 (9%)              | 2,467 (9%)           | 997 (9%)          | 1,866 (9%)           | < 0.01                    |
| 2012                                                        | 1,310 (9%)              | 2,304 (9%)           | 927 (9%)          | 1,792 (9%)           | 0.01                      |
| 2013                                                        | 1,302 (9%)              | 2,357 (9%)           | 953 (9%)          | 1,795 (9%)           | < 0.01                    |
| 2014                                                        | 1,320 (9%)              | 2,363 (9%)           | 948 (9%)          | 1,826 (9%)           | 0.01                      |
| 2015                                                        | 1,320 (9%)              | 2,357 (9%)           | 920 (9%)          | 1,802 (9%)           | 0.01                      |
| 2016                                                        | 1,339 (9%)              | 2,363 (9%)           | 944 (9%)          | 1,837 (9%)           | 0.01                      |
| 2017                                                        | 1,283 (9%)              | 2,329 (9%)           | 930 (9%)          | 1,787 (9%)           | 0.01                      |
| <b>SSRI new-use before the 2011 FDA warning<sup>b</sup></b> | 6,513 (44%)             | 11,658 (44%)         | 4,758 (44%)       | 8,864 (44%)          | 0.02                      |
| <b>Age (years)</b>                                          | 61 ± 15                 | 61 ± 15              | 61 ± 15           | 61 ± 15              | 0.01                      |
| <b>Female</b>                                               | 7,872 (53%)             | 13,989 (53%)         | 5,646 (53%)       | 10,709 (53%)         | 0.01                      |
| <b>Race</b>                                                 |                         |                      |                   |                      | < 0.01                    |
| Black                                                       | 5,303 (36%)             | 9,528 (36%)          | 3,872 (36%)       | 7,304 (36%)          | 0.01                      |
| White                                                       | 8,884 (60%)             | 15,867 (60%)         | 6,375 (59%)       | 12,119 (60%)         | 0.01                      |
| Other                                                       | 673 (5%)                | 1,185 (4%)           | 479 (4%)          | 917 (5%)             | < 0.01                    |
| <b>Hispanic</b>                                             | 2,609 (18%)             | 4,648 (17%)          | 1,861 (17%)       | 3,537 (17%)          | 0.01                      |
| <b>Medicare Part D low income subsidy</b>                   | 10,659 (72%)            | 19,025 (72%)         | 7,693 (72%)       | 14,556 (72%)         | < 0.01                    |
| <b>Cause of dialysis-dependent kidney failure</b>           |                         |                      |                   |                      |                           |
| Diabetes                                                    | 7,530 (51%)             | 13,453 (51%)         | 5,457 (51%)       | 10,296 (51%)         | 0.01                      |
| Hypertension                                                | 3,809 (26%)             | 6,794 (26%)          | 2,713 (25%)       | 5,204 (26%)          | 0.01                      |
| Glomerular disease                                          | 1,523 (10%)             | 2,721 (10%)          | 1,097 (10%)       | 2,089 (10%)          | < 0.01                    |
| Other                                                       | 1,998 (13%)             | 3,613 (14%)          | 1,458 (14%)       | 2,752 (14%)          | < 0.01                    |
| <b>History of a prior kidney transplant</b>                 | 957 (6%)                | 1,714 (6%)           | 691 (6%)          | 1,291 (6%)           | < 0.01                    |
| <b>Dialysis vintage</b>                                     |                         |                      |                   |                      | < 0.01                    |
| < 1.0 year                                                  | 2,461 (17%)             | 4,405 (17%)          | 1,788 (17%)       | 3,374 (17%)          | < 0.01                    |
| 1.0 – 1.9 years                                             | 2,769 (19%)             | 4,974 (19%)          | 1,976 (18%)       | 3,796 (19%)          | 0.01                      |
| 2.0 – 2.9 years                                             | 2,193 (15%)             | 3,965 (15%)          | 1,603 (15%)       | 3,005 (15%)          | 0.01                      |

|                                                            |              |              |             |              |        |
|------------------------------------------------------------|--------------|--------------|-------------|--------------|--------|
| ≥ 3.0 years                                                | 7,437 (50%)  | 13,237 (50%) | 5,358 (50%) | 10,165 (50%) | < 0.01 |
| <b>Anxiety</b>                                             | 3,359 (23%)  | 6,003 (23%)  | 2,411 (22%) | 4,547 (22%)  | 0.01   |
| <b>Depression</b>                                          | 5,310 (36%)  | 9,484 (36%)  | 3,818 (36%) | 7,237 (36%)  | < 0.01 |
| <b>Other psychiatric conditions</b>                        | 765 (5%)     | 1,353 (5%)   | 549 (5%)    | 1,044 (5%)   | < 0.01 |
| <b>Dementia</b>                                            | 1,662 (11%)  | 2,915 (11%)  | 1,190 (11%) | 2,208 (11%)  | 0.01   |
| <b>Insomnia</b>                                            | 1,251 (8%)   | 2,237 (8%)   | 905 (8%)    | 1,716 (8%)   | < 0.01 |
| <b>GERD</b>                                                | 4,797 (32%)  | 8,413 (32%)  | 3,400 (32%) | 6,488 (32%)  | 0.01   |
| <b>Peptic ulcer</b>                                        | 281 (2%)     | 506 (2%)     | 205 (2%)    | 371 (2%)     | 0.01   |
| <b>Other type of ulcer</b>                                 | 513 (3%)     | 925 (3%)     | 361 (3%)    | 678 (3%)     | 0.01   |
| <b>GI bleed</b>                                            | 1,768 (12%)  | 3,139 (12%)  | 1,270 (12%) | 2,360 (12%)  | 0.01   |
| <b>Arrhythmia</b>                                          | 4,799 (32%)  | 8,509 (32%)  | 3,492 (33%) | 6,538 (32%)  | 0.01   |
| <b>Conduction disorder</b>                                 | 1,456 (10%)  | 2,580 (10%)  | 1,038 (10%) | 1,979 (10%)  | < 0.01 |
| <b>Dyslipidemia</b>                                        | 8,293 (56%)  | 14,795 (56%) | 5,990 (56%) | 11,325 (56%) | < 0.01 |
| <b>Heart failure</b>                                       | 7,278 (49%)  | 12,968 (49%) | 5,314 (50%) | 9,930 (49%)  | 0.02   |
| <b>Hypertension</b>                                        | 13,668 (92%) | 24,399 (92%) | 9,858 (92%) | 18,676 (92%) | 0.01   |
| <b>Ischemic heart disease</b>                              | 7,422 (50%)  | 13,249 (50%) | 5,392 (50%) | 10,151 (50%) | 0.01   |
| <b>Peripheral artery disease</b>                           | 5,597 (38%)  | 9,917 (37%)  | 4,005 (37%) | 7,624 (37%)  | 0.01   |
| <b>Stroke</b>                                              | 4,015 (27%)  | 7,139 (27%)  | 2,920 (27%) | 5,422 (27%)  | 0.01   |
| <b>Valvular disease</b>                                    | 3,284 (22%)  | 5,842 (22%)  | 2,374 (22%) | 4,492 (22%)  | < 0.01 |
| <b>Cardiac pacemaker</b>                                   | 738 (5%)     | 1,306 (5%)   | 531 (5%)    | 1,004 (5%)   | < 0.01 |
| <b>ECG during the last 30 days of baseline</b>             | 4,450 (30%)  | 7,984 (30%)  | 3,258 (30%) | 6,096 (30%)  | 0.01   |
| <b>Cardiac surgery during the last 30 days of baseline</b> | 155 (1%)     | 264 (1%)     | 107 (1%)    | 214 (1%)     | 0.01   |
| <b>Asthma or COPD</b>                                      | 4,647 (31%)  | 8,292 (31%)  | 3,411 (32%) | 6,391 (31%)  | 0.01   |
| <b>Cancer</b>                                              | 1,366 (9%)   | 2,459 (9%)   | 1,003 (9%)  | 1,867 (9%)   | 0.01   |
| <b>Diabetes</b>                                            | 10,509 (71%) | 18,815 (71%) | 7,626 (71%) | 14,361 (71%) | 0.01   |
| <b>Hypothyroidism</b>                                      | 2,934 (20%)  | 5,177 (19%)  | 2,119 (20%) | 3,974 (20%)  | 0.01   |
| <b>Liver disease</b>                                       | 1,006 (7%)   | 1,751 (7%)   | 709 (7%)    | 1,368 (7%)   | 0.01   |
| <b>Sleep apnea</b>                                         | 1,827 (12%)  | 3,272 (12%)  | 1,324 (12%) | 2,516 (12%)  | < 0.01 |
| <b>Alcohol use or dependence</b>                           | 356 (2%)     | 641 (2%)     | 254 (2%)    | 479 (2%)     | < 0.01 |
| <b>Drug abuse or dependence</b>                            | 825 (6%)     | 1,469 (6%)   | 596 (6%)    | 1,136 (6%)   | < 0.01 |
| <b>Tobacco use</b>                                         | 2,169 (15%)  | 3,916 (15%)  | 1,592 (15%) | 2,997 (15%)  | 0.01   |
| <b>History of non-compliance</b>                           | 1,935 (13%)  | 3,481 (13%)  | 1,422 (13%) | 2,677 (13%)  | 0.01   |
| <b>Number of frailty indicators</b>                        |              |              |             |              |        |
| 0                                                          | 6,268 (42%)  | 11,281 (42%) | 4,504 (42%) | 8,663 (43%)  | 0.01   |
| 1                                                          | 3,198 (22%)  | 5,681 (21%)  | 2,309 (22%) | 4,377 (22%)  | < 0.01 |
| 2                                                          | 1,942 (13%)  | 3,546 (13%)  | 1,461 (14%) | 2,703 (13%)  | 0.02   |

|                                                             |             |              |             |             |        |
|-------------------------------------------------------------|-------------|--------------|-------------|-------------|--------|
| 3                                                           | 1,422 (10%) | 2,508 (9%)   | 997 (9%)    | 1,886 (9%)  | 0.01   |
| 4                                                           | 972 (7%)    | 1,719 (6%)   | 699 (7%)    | 1,301 (6%)  | 0.01   |
| 5                                                           | 597 (4%)    | 1,034 (4%)   | 427 (4%)    | 790 (4%)    | 0.01   |
| 6                                                           | 281 (2%)    | 495 (2%)     | 208 (2%)    | 376 (2%)    | 0.01   |
| ≥ 7                                                         | 180 (1%)    | 316 (1%)     | 120 (1%)    | 245 (1%)    | 0.01   |
| <b>Abnormal gait</b>                                        | 2,553 (17%) | 4,516 (17%)  | 1,829 (17%) | 3,450 (17%) | 0.01   |
| <b>Abnormal loss of weight or underweight</b>               | 534 (4%)    | 935 (4%)     | 384 (4%)    | 726 (4%)    | < 0.01 |
| <b>Cachexia</b>                                             | 204 (1%)    | 360 (1%)     | 149 (1%)    | 271 (1%)    | 0.01   |
| <b>Debility</b>                                             | 1,771 (12%) | 3,126 (12%)  | 1,268 (12%) | 2,367 (12%) | 0.01   |
| <b>Difficulty walking</b>                                   | 2,156 (15%) | 3,813 (14%)  | 1,538 (14%) | 2,902 (14%) | 0.01   |
| <b>Failure to thrive</b>                                    | 399 (3%)    | 709 (3%)     | 281 (3%)    | 530 (3%)    | 0.01   |
| <b>Fall history</b>                                         | 987 (7%)    | 1,757 (7%)   | 720 (7%)    | 1,339 (7%)  | 0.01   |
| <b>Malaise and fatigue</b>                                  | 5,153 (35%) | 9,174 (35%)  | 3,734 (35%) | 6,997 (34%) | 0.01   |
| <b>Muscular wasting and disease atrophy</b>                 | 721 (5%)    | 1,246 (5%)   | 495 (5%)    | 959 (5%)    | 0.01   |
| <b>Muscle weakness</b>                                      | 3,514 (24%) | 6,285 (24%)  | 2,555 (24%) | 4,749 (23%) | 0.01   |
| <b>Pressure ulcer</b>                                       | 1,972 (13%) | 3,472 (13%)  | 1,405 (13%) | 2,633 (13%) | 0.01   |
| <b>Senility</b>                                             | 112 (1%)    | 198 (1%)     | 81 (1%)     | 149 (1%)    | < 0.01 |
| <b>Using durable medical equipment (e.g., cane, walker)</b> | 1,159 (8%)  | 2,060 (8%)   | 857 (8%)    | 1,588 (8%)  | 0.01   |
| <b>Using nursing or healthcare services</b>                 | < 11 (0%)   | < 11 (0%)    | < 11 (0%)   | < 11 (0%)   | < 0.00 |
| <b>Alpha blocker</b>                                        | 414 (3%)    | 738 (3%)     | 294 (3%)    | 560 (3%)    | < 0.01 |
| <b>ACE inhibitor</b>                                        | 2,547 (17%) | 4,550 (17%)  | 1,833 (17%) | 3,475 (17%) | < 0.01 |
| <b>ARB</b>                                                  | 1,485 (10%) | 2,640 (10%)  | 1,063 (10%) | 2,031 (10%) | < 0.01 |
| <b>Beta blocker</b>                                         | 5,731 (39%) | 10,160 (38%) | 4,089 (38%) | 7,819 (38%) | 0.01   |
| <b>Calcium channel blocker</b>                              | 4,355 (29%) | 7,746 (29%)  | 3,114 (29%) | 5,947 (29%) | 0.01   |
| <b>Central alpha agonist</b>                                | 1,809 (12%) | 3,212 (12%)  | 1,285 (12%) | 2,453 (12%) | 0.01   |
| <b>Diuretic</b>                                             | 1,475 (10%) | 2,623 (10%)  | 1,066 (10%) | 2,035 (10%) | 0.01   |
| <b>Vasodilator</b>                                          | 1,706 (11%) | 3,028 (11%)  | 1,208 (11%) | 2,321 (11%) | 0.01   |
| <b>Anticoagulant</b>                                        | 1,139 (8%)  | 2,026 (8%)   | 834 (8%)    | 1,537 (8%)  | 0.01   |
| <b>Antiplatelet</b>                                         | 1,759 (12%) | 3,118 (12%)  | 1,255 (12%) | 2,400 (12%) | < 0.01 |
| <b>Statin</b>                                               | 3,981 (27%) | 7,014 (26%)  | 2,847 (27%) | 5,443 (27%) | 0.01   |
| <b>Non-statin cholesterol med</b>                           | 542 (4%)    | 950 (4%)     | 389 (4%)    | 748 (4%)    | 0.01   |
| <b>Antiarrhythmic</b>                                       | 507 (3%)    | 890 (3%)     | 368 (3%)    | 700 (3%)    | 0.01   |
| <b>Digoxin</b>                                              | 221 (1%)    | 396 (1%)     | 164 (2%)    | 295 (1%)    | 0.01   |
| <b>Long-acting nitrate</b>                                  | 991 (7%)    | 1,770 (7%)   | 725 (7%)    | 1,365 (7%)  | < 0.01 |
| <b>Midodrine</b>                                            | 449 (3%)    | 813 (3%)     | 331 (3%)    | 616 (3%)    | < 0.01 |



|                                                             |             |              |             |             |        |
|-------------------------------------------------------------|-------------|--------------|-------------|-------------|--------|
| <b>≥ 1 CYP 3A4 inhibitor</b>                                | 1,068 (7%)  | 1,919 (7%)   | 786 (7%)    | 1,487 (7%)  | 0.01   |
| <b>≥ 1 other CYP 2C19 inhibitor</b>                         | 1,846 (12%) | 3,279 (12%)  | 1,319 (12%) | 2,505 (12%) | < 0.01 |
| <b>≥ 1 med with any TdP risk</b>                            | 5,417 (36%) | 9,620 (36%)  | 3,916 (37%) | 7,345 (36%) | 0.01   |
| <b>≥ 1 med with known TdP risk</b>                          | 1,513 (10%) | 2,694 (10%)  | 1,095 (10%) | 2,048 (10%) | < 0.01 |
| <b>≥ 1 med with possible TdP risk</b>                       | 1,495 (10%) | 2,671 (10%)  | 1,081 (10%) | 2,016 (10%) | 0.01   |
| <b>≥ 1 med with conditional TdP risk</b>                    | 3,664 (25%) | 6,452 (24%)  | 2,630 (25%) | 4,970 (24%) | 0.01   |
| <b>Number of baseline hospital admissions</b>               |             |              |             |             |        |
| 0 admissions                                                | 5,530 (37%) | 9,956 (37%)  | 3,982 (37%) | 7,636 (38%) | 0.01   |
| 1 – 2 admissions                                            | 5,647 (38%) | 10,078 (38%) | 4,027 (38%) | 7,740 (38%) | 0.01   |
| 3 – 4 admissions                                            | 2,416 (16%) | 4,298 (16%)  | 1,781 (17%) | 3,285 (16%) | 0.01   |
| ≥ 5 admissions                                              | 1,267 (9%)  | 2,249 (8%)   | 936 (9%)    | 1,680 (8%)  | 0.02   |
| <b>Hospitalized in the last 30 days of baseline</b>         | 4,565 (31%) | 8,102 (30%)  | 3,287 (31%) | 6,167 (30%) | 0.01   |
| <b>Number of baseline ED visits</b>                         |             |              |             |             |        |
| 0 ED visits                                                 | 3,758 (25%) | 6,788 (26%)  | 2,725 (25%) | 5,188 (26%) | 0.01   |
| 1 – 2 ED visits                                             | 5,378 (36%) | 9,605 (36%)  | 3,848 (36%) | 7,382 (36%) | 0.01   |
| 3 – 4 ED visits                                             | 2,873 (19%) | 5,109 (19%)  | 2,058 (19%) | 3,907 (19%) | < 0.01 |
| ≥ 5 ED visits                                               | 2,850 (19%) | 5,078 (19%)  | 2,094 (20%) | 3,863 (19%) | 0.01   |
| <b>ED visit in the last 30 days of baseline</b>             | 5,131 (35%) | 9,143 (34%)  | 3,711 (35%) | 7,004 (34%) | < 0.01 |
| <b>SNF admission during baseline</b>                        | 3,557 (24%) | 6,281 (24%)  | 2,597 (24%) | 4,763 (23%) | 0.02   |
| <b>Mental health hospitalization during baseline</b>        | 91 (1%)     | 155 (1%)     | 55 (1%)     | 117 (1%)    | 0.01   |
| <b>Outpatient visit with a psychiatrist during baseline</b> | 392 (3%)    | 704 (3%)     | 284 (3%)    | 536 (3%)    | < 0.01 |
| <b>Psychotherapy during baseline</b>                        | 1,461 (10%) | 2,578 (10%)  | 1,037 (10%) | 1,938 (10%) | 0.01   |

Values are given as number (%) for categorical variables and as mean ± standard deviation for continuous variables. All covariates were measured during the 180-day baseline period. The weighted cohort is the pseudo-population generated by inverse probability of treatment weighting.

<sup>a</sup> The standardized differences displayed in the table are the maximum absolute standardized differences observed across all exposure group pairs. A standardized difference > 0.10 represents meaningful imbalance between groups.

<sup>b</sup> The FDA issued a Drug Safety Communication on August 28, 2011, warning that abnormal heart rhythms have been associated with high doses of citalopram.

<sup>c</sup> The CredibleMeds website (<https://crediblemeds.org>) is a reliable online clinical resource with up-to-date information about medications that can cause QT-prolongation and/or torsades de pointes. CredibleMeds classifies QT-prolonging medications as having a known, possible, or conditional TdP risk. Lists of medications falling into each category are provided in Table S3. Medications classified as having any level of TdP risk are those falling into any of the 3 CredibleMeds categories.

**Abbreviations:** ACE, angiotensin converting enzyme; ARB, angiotensin receptor blocker; COPD, chronic obstructive pulmonary disease; CYP, cytochrome P450; ECG, electrocardiogram; ED, emergency department; FDA, Food and Drug Administration; GERD, gastroesophageal reflux disease; GI, gastrointestinal; med, medication; PPI, proton pump inhibitor; SNF, skilled nursing facility; SSRI, selective serotonin reuptake inhibitor; TdP, Torsades de Pointes

**Table S6. Association between SSRI-PPI exposure group and the 1-year risk of sudden cardiac death**

| Sudden cardiac death – primary outcome |        |               |                    |                   |                      |
|----------------------------------------|--------|---------------|--------------------|-------------------|----------------------|
| Exposure group                         | n      | No. of events | Rate per 1,000 p-y | Crude HR (95% CI) | Weighted HR (95% CI) |
| Sert + no PPI                          | 20,294 | 280           | 62.9               | 1.00 (ref.)       | 1.00 (ref.)          |
| Sert + PPI                             | 10,779 | 177           | 78.0               | 1.24 (1.03, 1.50) | 1.03 (0.85, 1.26)    |
| Cital/escit + no PPI                   | 26,503 | 448           | 78.6               | 1.25 (1.07, 1.45) | 1.22 (1.06, 1.41)    |
| Cital/escit + PPI                      | 14,983 | 292           | 95.3               | 1.50 (1.27, 1.77) | 1.31 (1.11, 1.54)    |

An on-treatment analytic approach was used in all analyses. Fine and Gray proportional subdistribution hazards models were used to estimate hazard ratios and Inverse probability of treatment weighting was used for confounding control.

Abbreviations: CI, confidence interval; cital/escital, citalopram or escitalopram; HR hazard ratio; No., number PPI, proton pump inhibitor; p-y, person-years; ref., referent; sert, sertraline

**Table S7. Association between SSRI–PPI exposure group and the 1-year risk of sudden cardiac death considering citalopram and escitalopram separately**

| Considering citalopram separately   |        |               |                    |                   |                      |
|-------------------------------------|--------|---------------|--------------------|-------------------|----------------------|
| Exposure group                      | n      | No. of events | Rate per 1,000 p-y | Crude HR (95% CI) | Weighted HR (95% CI) |
| Sert + no PPI                       | 20,294 | 280           | 62.9               | 1.00 (ref.)       | 1.00 (ref.)          |
| Sert + PPI                          | 10,779 | 177           | 78.0               | 1.24 (1.03, 1.50) | 1.03 (0.85, 1.26)    |
| Cital + no PPI                      | 13,620 | 235           | 77.7               | 1.24 (1.04, 1.47) | 1.20 (1.02, 1.44)    |
| Cital + PPI                         | 7,433  | 138           | 88.0               | 1.40 (1.14, 1.71) | 1.28 (1.03, 1.58)    |
| Considering escitalopram separately |        |               |                    |                   |                      |
| Exposure group                      | n      | No. of events | Rate per 1,000 p-y | Crude HR (95% CI) | Weighted HR (95% CI) |
| Sert + no PPI                       | 20,294 | 280           | 62.9               | 1.00 (ref.)       | 1.00 (ref.)          |
| Sert + PPI                          | 10,779 | 177           | 78.0               | 1.24 (1.03, 1.50) | 1.04 (0.86, 1.27)    |
| Escit + no PPI                      | 11,418 | 213           | 79.5               | 1.25 (1.05, 1.50) | 1.23 (1.03, 1.46)    |
| Escit + PPI                         | 6,464  | 154           | 102.9              | 1.61 (1.32, 1.96) | 1.36 (1.11, 1.66)    |

An on-treatment analytic approach was used in all analyses. Fine and Gray proportional subdistribution hazards models were used to estimate hazard ratios and Inverse probability of treatment weighting was used for confounding control.

Abbreviations: CI, confidence interval; cital, citalopram; escital, escitalopram; HR hazard ratio; No., number PPI, proton pump inhibitor; p-y, person-years; ref., referent; sert, sertraline

**Table S8. Results from sensitivity analyses**

| <b>Sensitivity analysis using a zero day grace period to define SSRI and PPI discontinuation</b> |          |                      |                           |                          |                             |
|--------------------------------------------------------------------------------------------------|----------|----------------------|---------------------------|--------------------------|-----------------------------|
| <b>Exposure group</b>                                                                            | <b>n</b> | <b>No. of events</b> | <b>Rate per 1,000 p-y</b> | <b>Crude HR (95% CI)</b> | <b>Weighted HR (95% CI)</b> |
| Sert + no PPI                                                                                    | 20,294   | 218                  | 65.2                      | 1.00 (ref.)              | 1.00 (ref.)                 |
| Sert + PPI                                                                                       | 10,779   | 127                  | 86.9                      | 1.32 (1.05, 1.64)        | 1.10 (0.85, 1.40)           |
| Cital/escit + no PPI                                                                             | 26,503   | 327                  | 76.0                      | 1.16 (0.98, 1.38)        | 1.15 (0.97, 1.36)           |
| Cital/escit + PPI                                                                                | 14,983   | 189                  | 93.9                      | 1.42 (1.16, 1.72)        | 1.21 (1.00, 1.48)           |
| <b>Sensitivity analysis excluding patients on other CYP 2C19 inhibitors</b>                      |          |                      |                           |                          |                             |
| <b>Exposure group</b>                                                                            | <b>n</b> | <b>No. of events</b> | <b>Rate per 1,000 p-y</b> | <b>Crude HR (95% CI)</b> | <b>Weighted HR (95% CI)</b> |
| Sert + no PPI                                                                                    | 18,028   | 247                  | 63.0                      | 1.00 (ref.)              | 1.00 (ref.)                 |
| Sert + PPI                                                                                       | 9,242    | 146                  | 75.4                      | 1.08 (0.96, 1.22)        | 0.98 (0.80, 1.21)           |
| Cital/escit + no PPI                                                                             | 23,590   | 391                  | 78.5                      | 1.05 (0.95, 1.15)        | 1.20 (1.03, 1.40)           |
| Cital/escit + PPI                                                                                | 12,809   | 245                  | 94.8                      | 1.22 (1.10, 1.36)        | 1.28 (1.07, 1.53)           |
| <b>Sensitivity analysis restricted to patients with the Medicare Part D low income subsidy</b>   |          |                      |                           |                          |                             |
| <b>Exposure group</b>                                                                            | <b>n</b> | <b>No. of events</b> | <b>Rate per 1,000 p-y</b> | <b>Crude HR (95% CI)</b> | <b>Weighted HR (95% CI)</b> |
| Sert + no PPI                                                                                    | 13,782   | 170                  | 56.1                      | 1.00 (ref.)              | 1.00 (ref.)                 |
| Sert + PPI                                                                                       | 7,946    | 125                  | 74.3                      | 1.33 (1.06, 1.67)        | 1.09 (0.84, 1.46)           |
| Cital/escit + no PPI                                                                             | 18,607   | 319                  | 79.9                      | 1.42 (1.18, 1.71)        | 1.35 (1.13, 1.63)           |
| Cital/escit + PPI                                                                                | 11,559   | 224                  | 93.1                      | 1.64 (1.35, 2.01)        | 1.41 (1.15, 1.71)           |
| <b>Sensitivity analysis only considering PPI users taking an PPI for &gt;30 days</b>             |          |                      |                           |                          |                             |
| <b>Exposure group</b>                                                                            | <b>n</b> | <b>No. of events</b> | <b>Rate per 1,000 p-y</b> | <b>Crude HR (95% CI)</b> | <b>Weighted HR (95% CI)</b> |
| Sert + no PPI                                                                                    | 20,294   | 280                  | 62.9                      | 1.00 (ref.)              | 1.00 (ref.)                 |
| Sert + PPI                                                                                       | 6,398    | 99                   | 66.7                      | 1.09 (0.87, 1.37)        | 1.04 (0.82, 1.32)           |
| Cital/escit + no PPI                                                                             | 26,503   | 448                  | 78.6                      | 1.25 (1.07, 1.45)        | 1.22 (1.05, 1.41)           |
| Cital/escit + PPI                                                                                | 8,588    | 153                  | 79.9                      | 1.29 (1.06, 1.57)        | 1.31 (1.08, 1.60)           |
| <b>Sensitivity analysis only considering PPI users taking an PPI for ≤ 30 days</b>               |          |                      |                           |                          |                             |
| <b>Exposure group</b>                                                                            | <b>n</b> | <b>No. of events</b> | <b>Rate per 1,000 p-y</b> | <b>Crude HR (95% CI)</b> | <b>Weighted HR (95% CI)</b> |
| Sert + no PPI                                                                                    | 20,294   | 280                  | 62.9                      | 1.00 (ref.)              | 1.00 (ref.)                 |
| Sert + PPI                                                                                       | 4,381    | 78                   | 99.3                      | 1.51 (1.17, 1.93)        | 1.03 (0.75, 1.31)           |
| Cital/escit + no PPI                                                                             | 26,503   | 448                  | 78.6                      | 1.25 (1.07, 1.44)        | 1.21 (1.04, 1.40)           |
| Cital/escit + PPI                                                                                | 6,395    | 139                  | 121.0                     | 1.82 (1.49, 2.23)        | 1.30 (1.04, 1.64)           |

An on-treatment analytic approach was used in all analyses. Fine and Gray proportional subdistribution hazards models were used to estimate hazard ratios and inverse probability of treatment weighting was used for confounding control.

**Abbreviations:** CI, confidence interval; cital/escital, citalopram or escitalopram; CYP, cytochrome P450; HR hazard ratio; No., number PPI, proton pump inhibitor; p-y, person-years; ref., referent; sert, sertraline; SSRI, selective serotonin reuptake inhibitor.

**Table S9. Association between SSRI-PPI exposure group and the 1-year risk of the negative control outcome**

| Death due to a cause other than sudden cardiac death – negative control outcome |        |               |                    |                   |                      |
|---------------------------------------------------------------------------------|--------|---------------|--------------------|-------------------|----------------------|
| Exposure group                                                                  | n      | No. of events | Rate per 1,000 p-y | Crude HR (95% CI) | Weighted HR (95% CI) |
| Sert + no PPI                                                                   | 20,294 | 883           | 198.2              | 1.00 (ref.)       | 1.00 (ref.)          |
| Sert + PPI                                                                      | 10,779 | 465           | 205.0              | 1.04 (0.93, 1.16) | 1.00 (0.89, 1.11)    |
| Cital/escit + no PPI                                                            | 26,503 | 1,166         | 204.5              | 1.03 (0.94, 1.12) | 0.97 (0.89, 1.06)    |
| Cital/escit + PPI                                                               | 14,983 | 711           | 232.0              | 1.16 (1.05, 1.28) | 1.01 (0.91, 1.12)    |

An on-treatment analytic approach was used in all analyses. Fine and Gray proportional subdistribution hazards models were used to estimate hazard ratios and inverse probability of treatment weighting was used for confounding control.

Abbreviations: CI, confidence interval; cital/escital, citalopram or escitalopram; HR hazard ratio; No., number; PPI, proton pump inhibitor; p-y, person-years; ref., referent; sert, sertraline.
